# Supplementary material for: Pretreatment of aged mice with retinoic acid supports alveolar regeneration via upregulation of reciprocal PDGFA signalling
Source: HighWire-hosted journal article supplement (doi:10.1136/thoraxjnl-2020-214986), 2021-01-21
Supplement: thoraxjnl-2020-214986supp002_data_supplement.xlsx [file thoraxjnl-2020-214986supp002_data_supplement.xlsx]

## Sheet: Antibody
Antibody	Source	Catalog #	Lot #	I.F. diliution	FACs dilution
E-Cadherin	R&D Systems	MAB7481	JZQ0311121	1/2000
AGER	R&D Systems	AF1145	HCE0717082	1/200
SFTPC	Seven Hills	R458		1/100
HOPX	Santa Cruz	sc-30216		1/100
MUC5B	Santa Cruz	SC-20119	B1003	1/200
TP63	Biocare	CM163A	102214	1/100
CCSP/SCGB1A1	Seven Hills	G210		1/3000
Acetylated Tubulin	Sigma	T7451	025M4757V	1/2000
PDGFA	Santa Cruz	sc-9974		1/200
ABCA3	Seven Hills	WMAB-17G524		1/200
aSMA	Sigma	A5228		1/5000	1/10,000
CD31 (PECAM-1)	E-Biosciences	17-0311			1/100
	E-Biosciences	48-0311			1/100
CD34	E-Biosciences	50-0341			1/100
	E-Biosciences	48-0341			1/100
CD45	E-Biosciences	48-0451			1/100
	E-Biosciences	17-0451			1/100
CD140a (PDGF Receptor a)	E-Biosciences	17-1401			1/100
CD326 (EpCAM)	E-Biosciences	48-5791			1/100
Ki-67	E-Biosciences	51-5698			1/100
CD29	E-Biosciences	47-0291			1/100
ADRP	abcam	ab108323			1/250
Live/Dead	E-Biosciences	65-0865-14			1/1000
