# Supplementary material for: Pretreatment of aged mice with retinoic acid supports alveolar regeneration via upregulation of reciprocal PDGFA signalling
Source: HighWire-hosted journal article supplement (doi:10.1136/thoraxjnl-2020-214986), 2021-01-21
Supplement: thoraxjnl-2020-214986supp003_data_supplement.xlsx [file thoraxjnl-2020-214986supp003_data_supplement.xlsx]

## Sheet: Taqman probes
	Target	Taqman ID
Mouse	Wnt2	Mm00470018_m1
Mouse	Wnt5a	Mm00437347_m1
Mouse	Fgf1	Mm00438906_m1
Mouse	Pdgfra	Mm00440701_m1
Mouse	Cd248	Mm00547485_s1
Mouse	Pdgfa	Mm01205760_m1
Mouse	Acta2	Mm00725412_s1
Mouse	Pdgfb	Mm00440677_m1
Human	VIM	Hs00958111_m1
Human	FN1	Hs01549976_m1
Human	MMP9	Hs00957562_m1
Human	PDGFRa	Hs00998018_m1
Human	PLIN2	Hs00605340_m1
Human	TCF21	Hs00162646_m1
