# Supplementary figures and images for: Pretreatment of aged mice with retinoic acid supports alveolar regeneration via upregulation of reciprocal PDGFA signalling
Source: HighWire-hosted journal article supplement (doi:10.1136/thoraxjnl-2020-214986), 2021-01-21

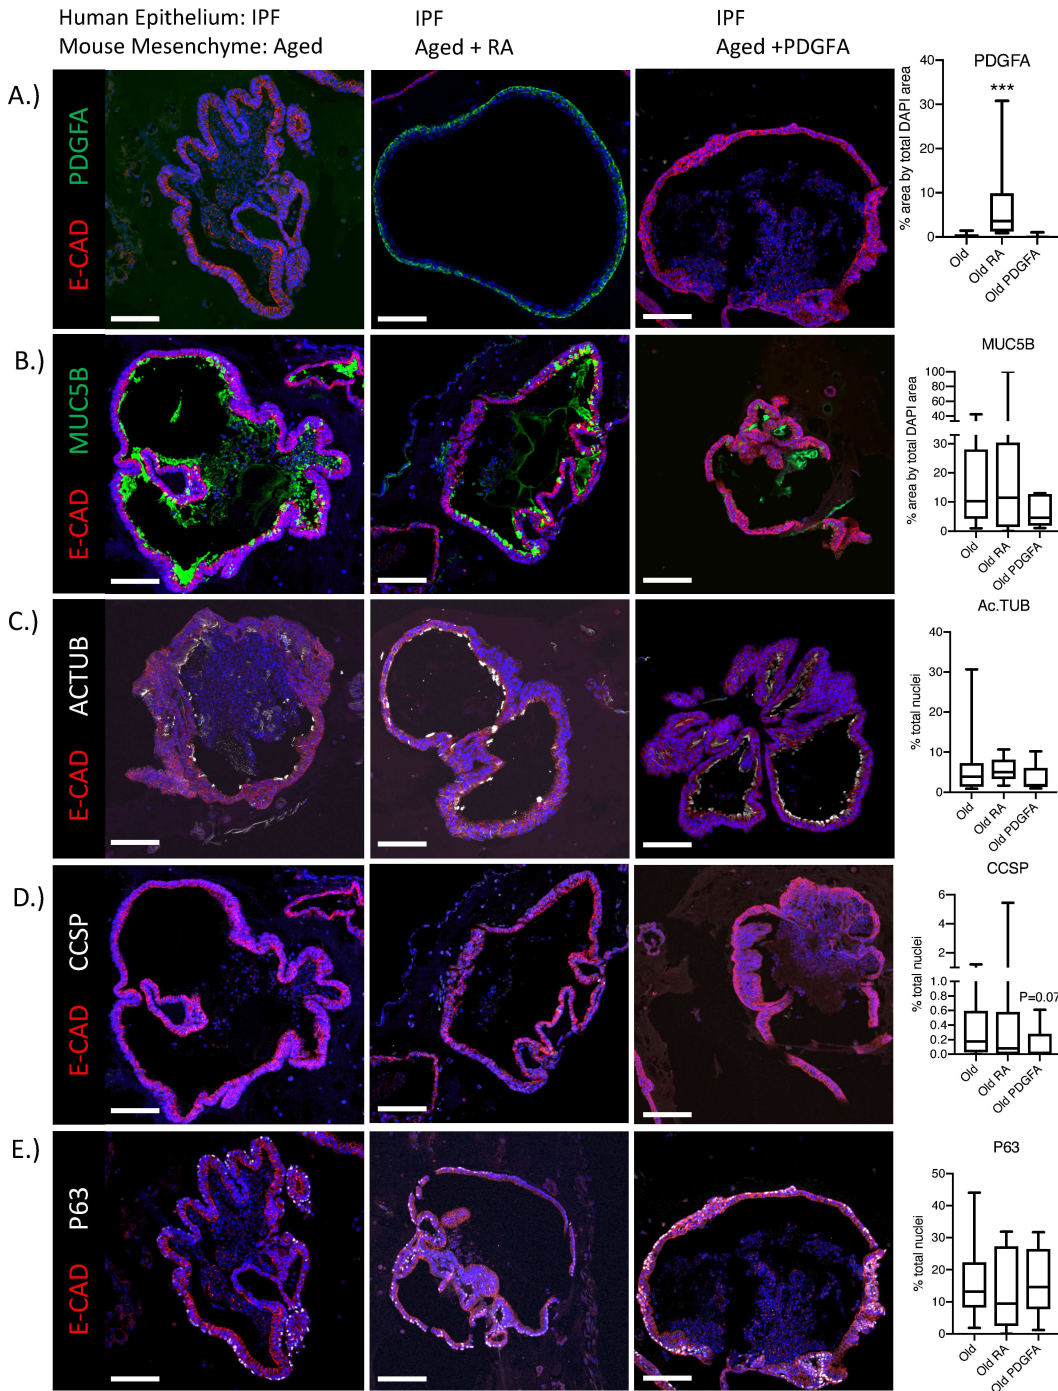

Supplement: thoraxjnl-2020-214986supp007_data_supplement.pdf [file thoraxjnl-2020-214986supp007_data_supplement.pdf]

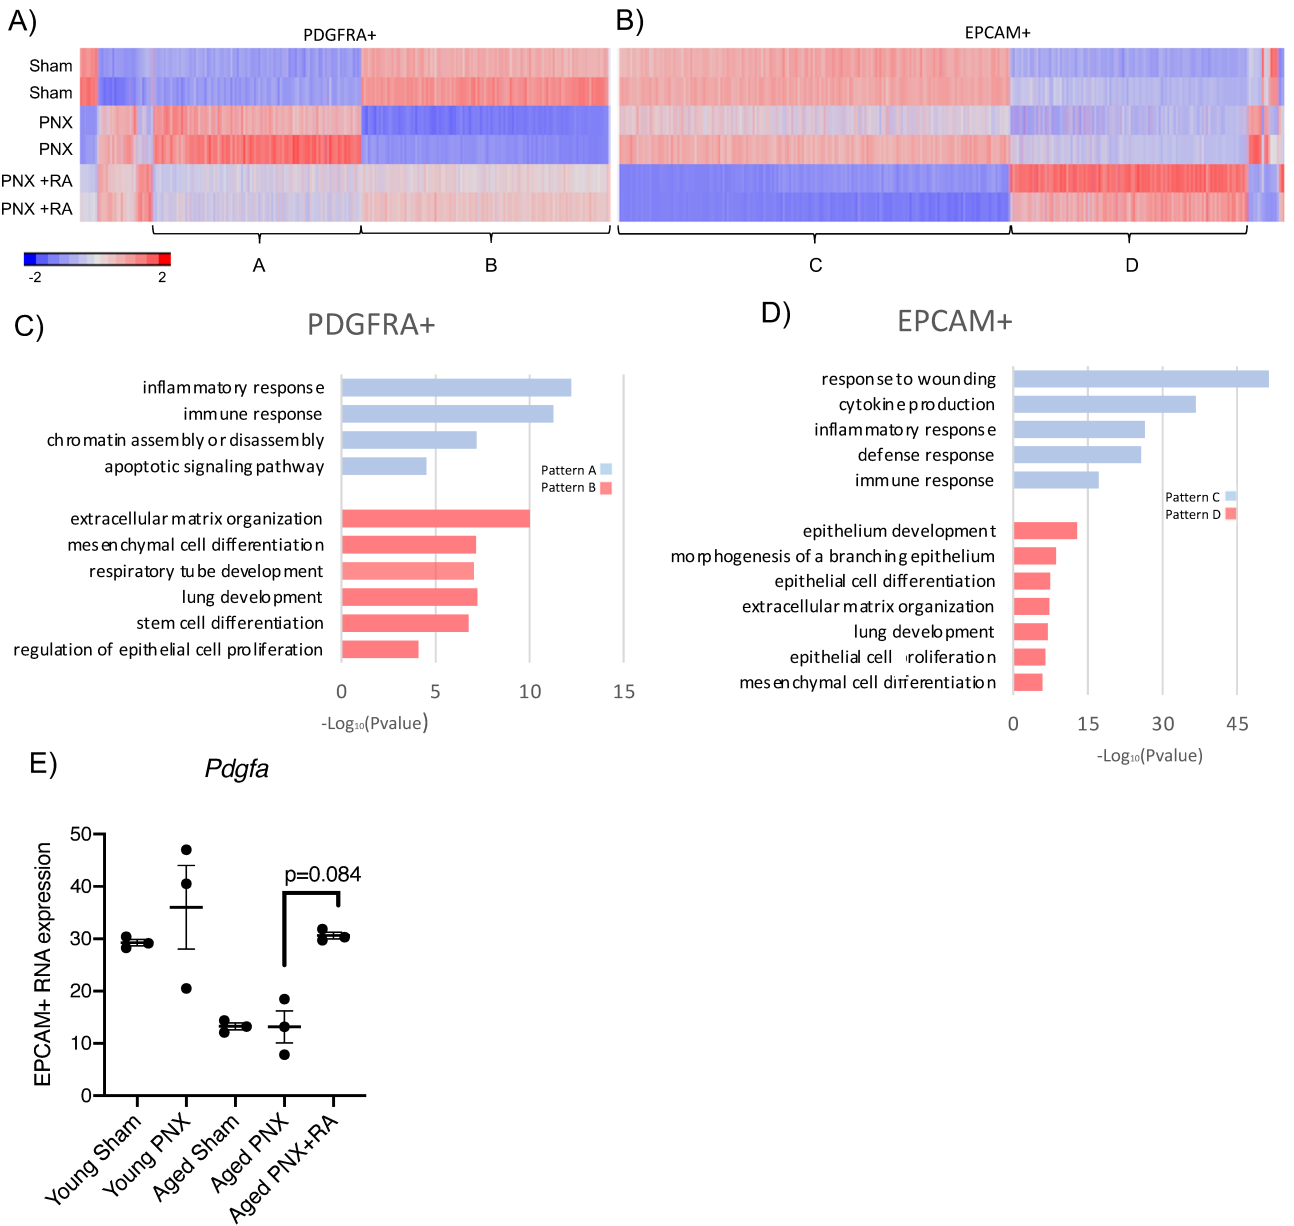

Supplement: thoraxjnl-2020-214986supp004_data_supplement.pdf [file thoraxjnl-2020-214986supp004_data_supplement.pdf]

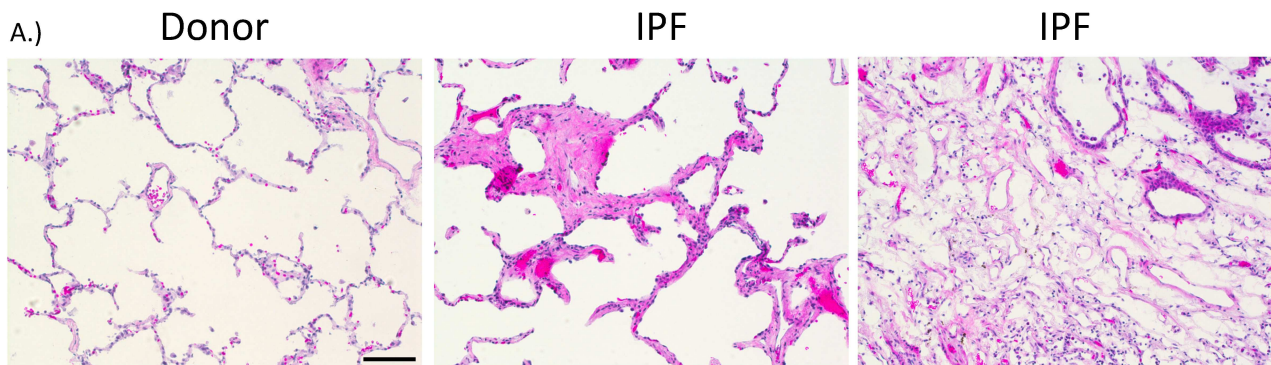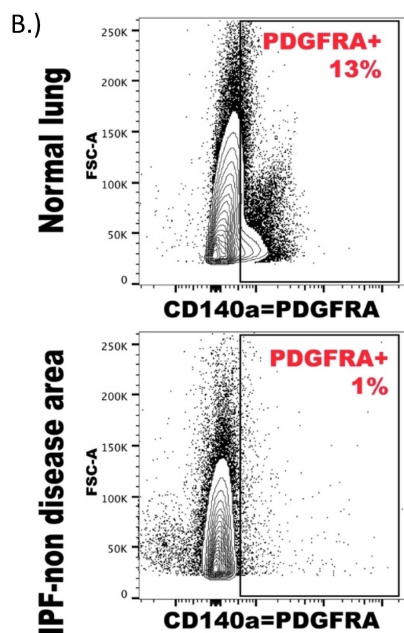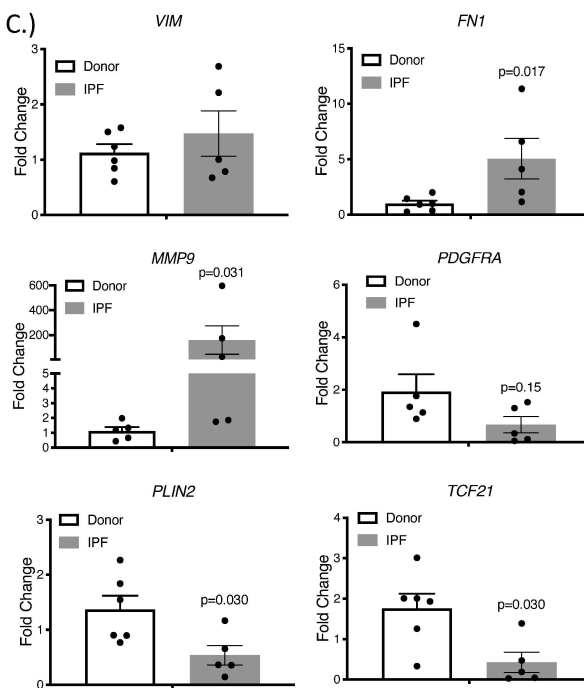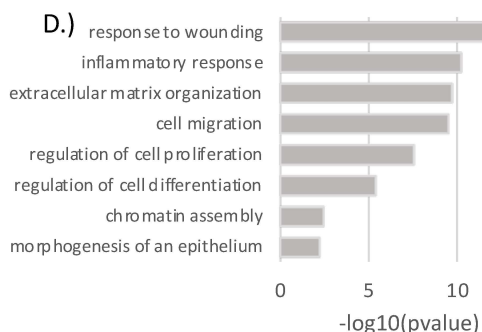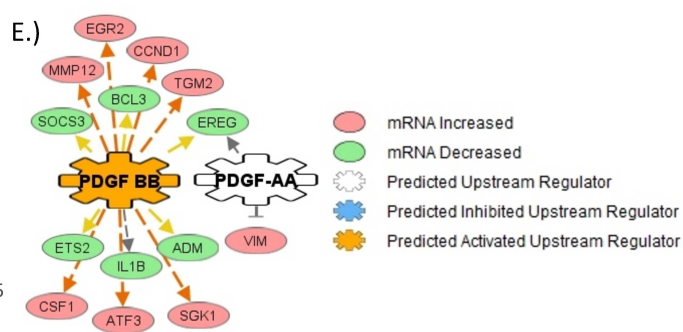

Supplement: thoraxjnl-2020-214986supp006_data_supplement.pdf [file thoraxjnl-2020-214986supp006_data_supplement.pdf]

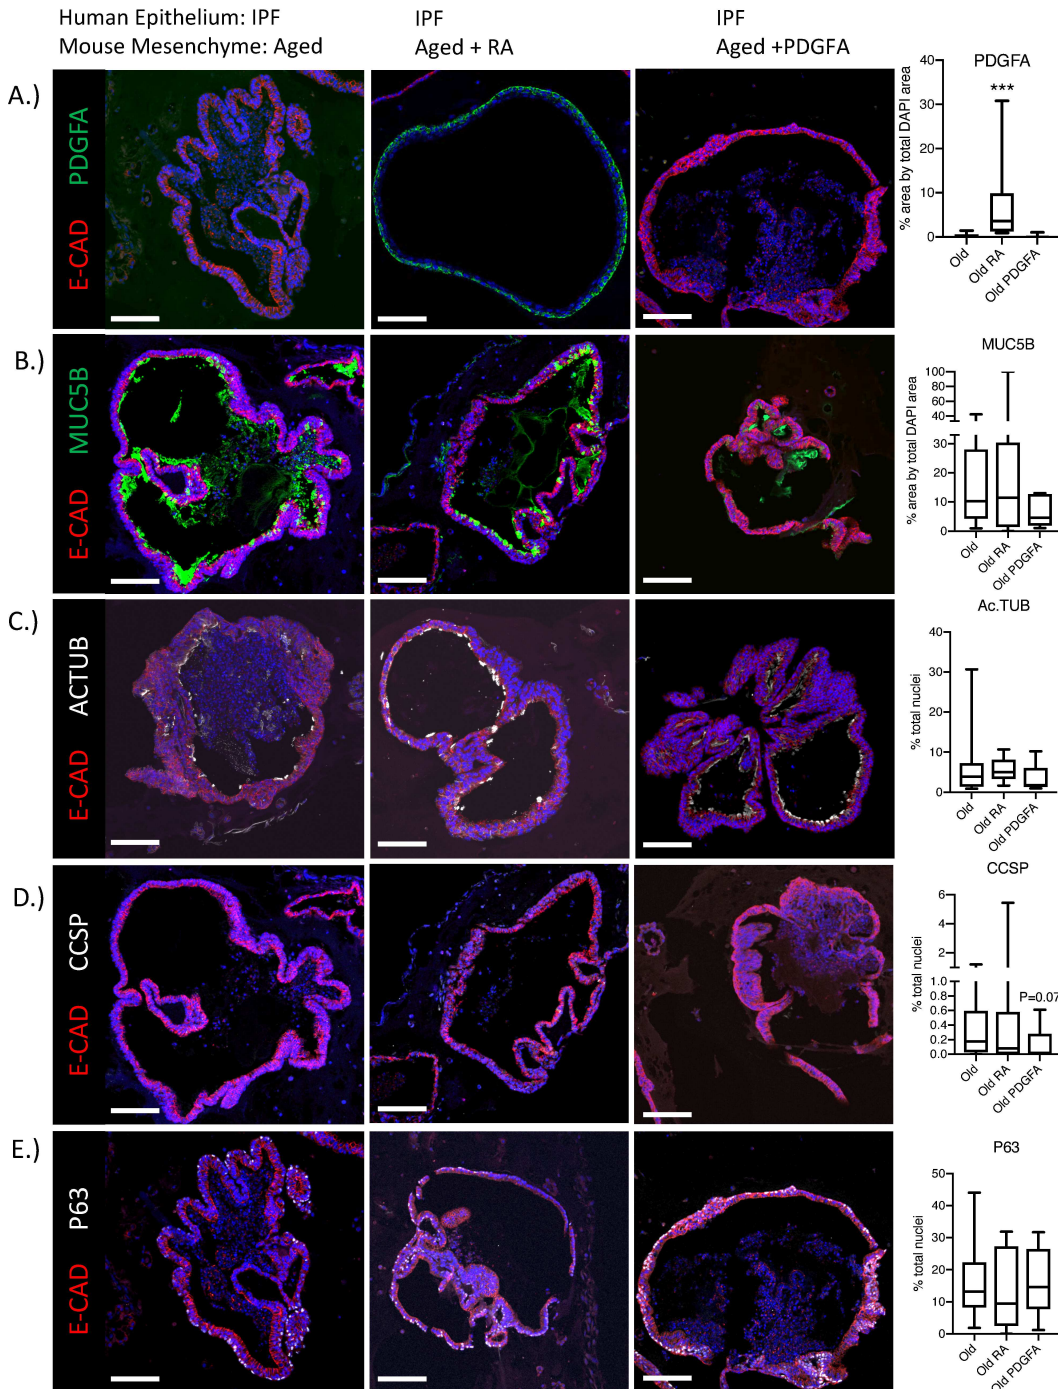

Supplement: thoraxjnl-2020-214986supp007_data_supplement.pdf [file thoraxjnl-2020-214986supp007_data_supplement.pdf]

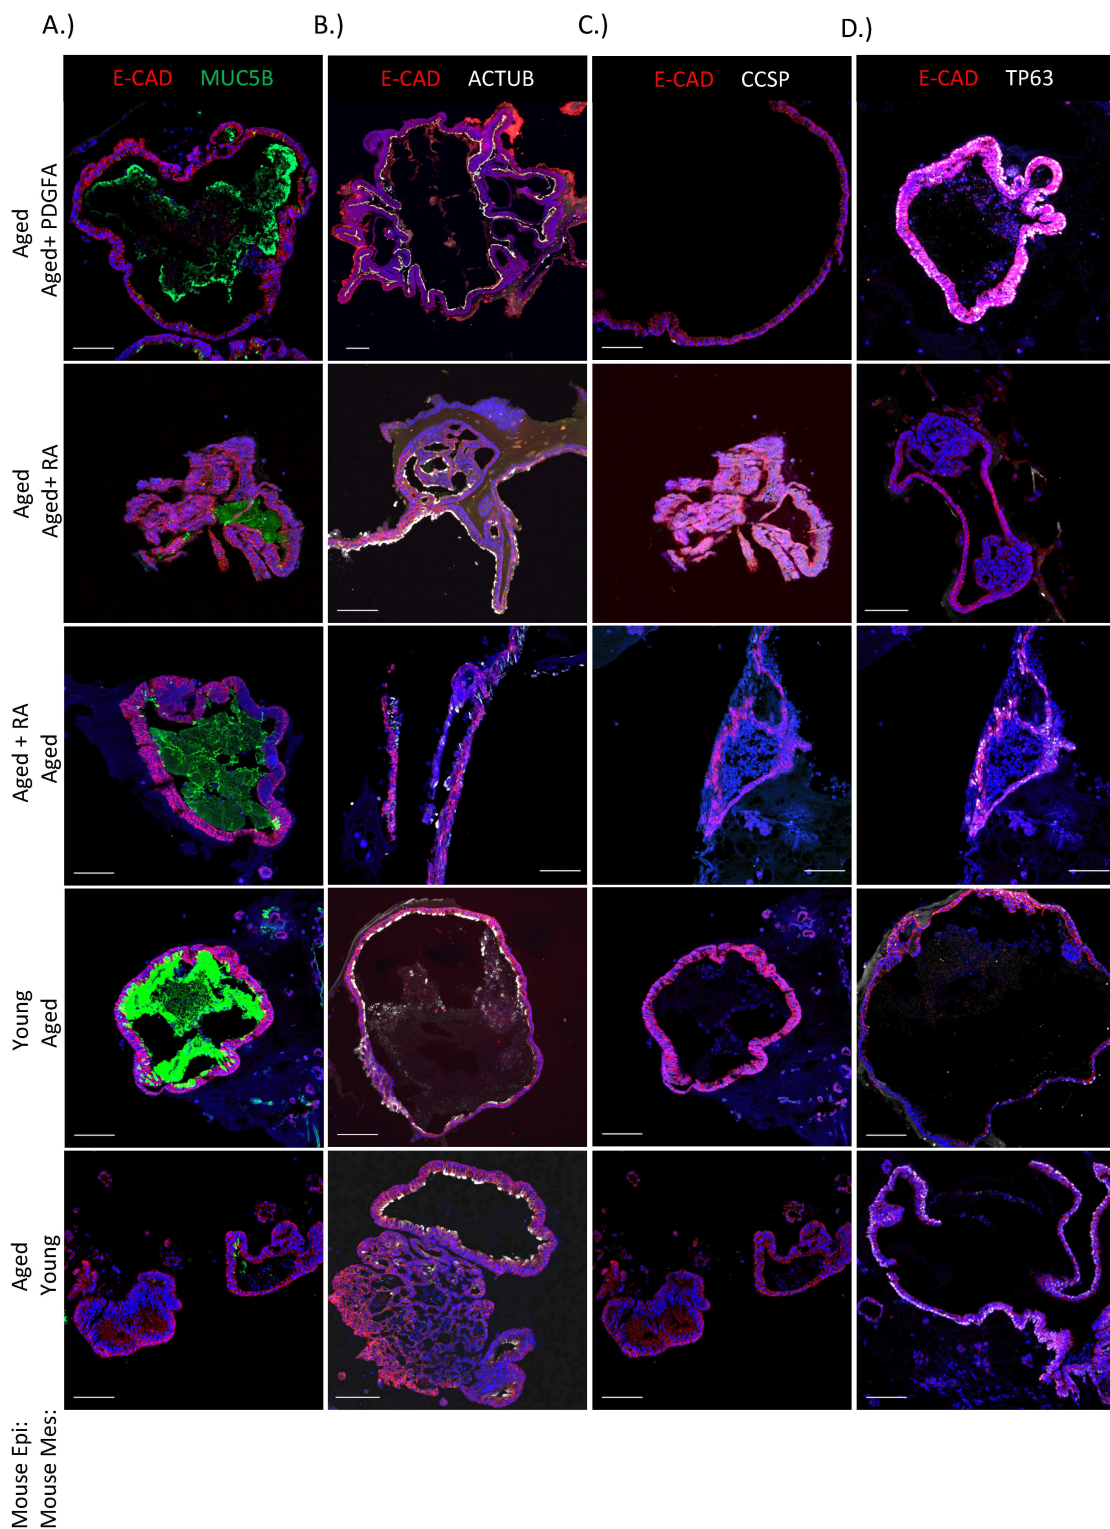

Supplement: thoraxjnl-2020-214986supp008_data_supplement.pdf [file thoraxjnl-2020-214986supp008_data_supplement.pdf]
